# Supplementary material for: Murine Beta-Amyloid (1–42) Oligomers Disrupt Endothelial Barrier Integrity and VEGFR Signaling via Activating Astrocytes to Release Deleterious Soluble Factors
Source: MDPI journal article supplement (doi:10.3390/ijms23031878), 2022-02-07
Supplement: s1 [file s1]

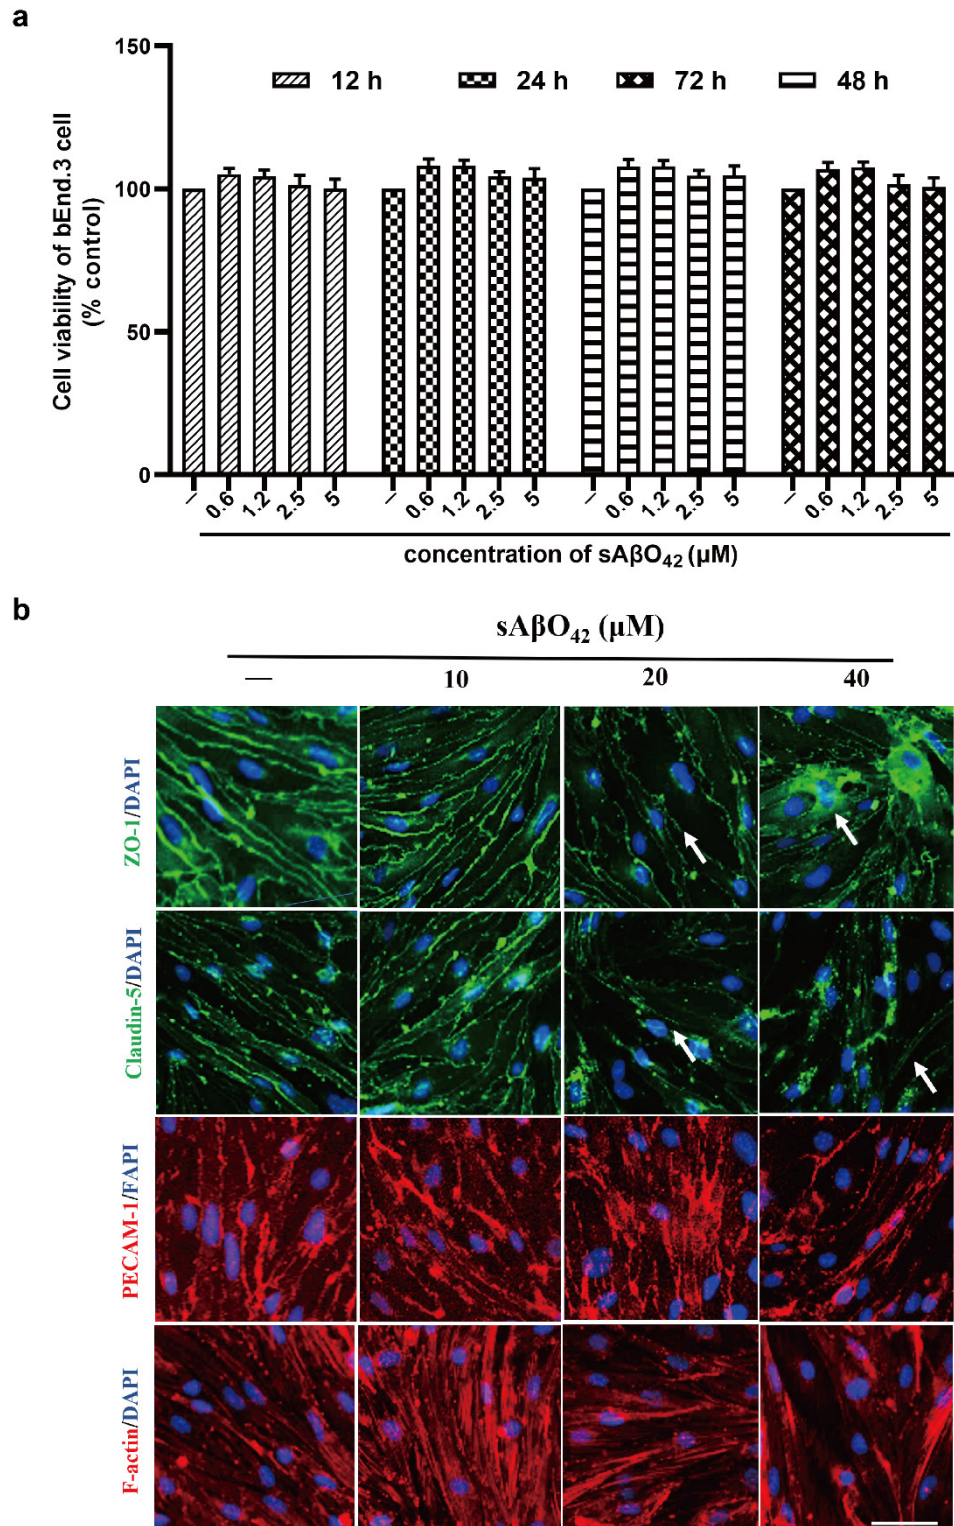

**Figure S1.** (a) sAβO<sub>42</sub> (<5μM) showed no toxicity on cell viability of bEnd.3 cells. (b) sAβO<sub>42</sub> decreased the expressions of junctional proteins in bEnd.3 in a dose-dependent manner. Immunofluorescent staining of tight junction proteins (ZO-1, Claudin-5), adherens junction proteins (VE-cadherin, PECAM-1, β-catenin) and cytoskeleton (F-actin). Scale bar, 3μm. Detected by IN Cell Analyzer 2000 (40×, 21°C) and analyzed by Image J software. Data are shown as mean±SD of three independent experiments and analyzed by one-way ANOVA followed by Tukey's test. \*P≤0.1, \*\*P≤0.01, \*\*\*P≤0.001 vs. control group.

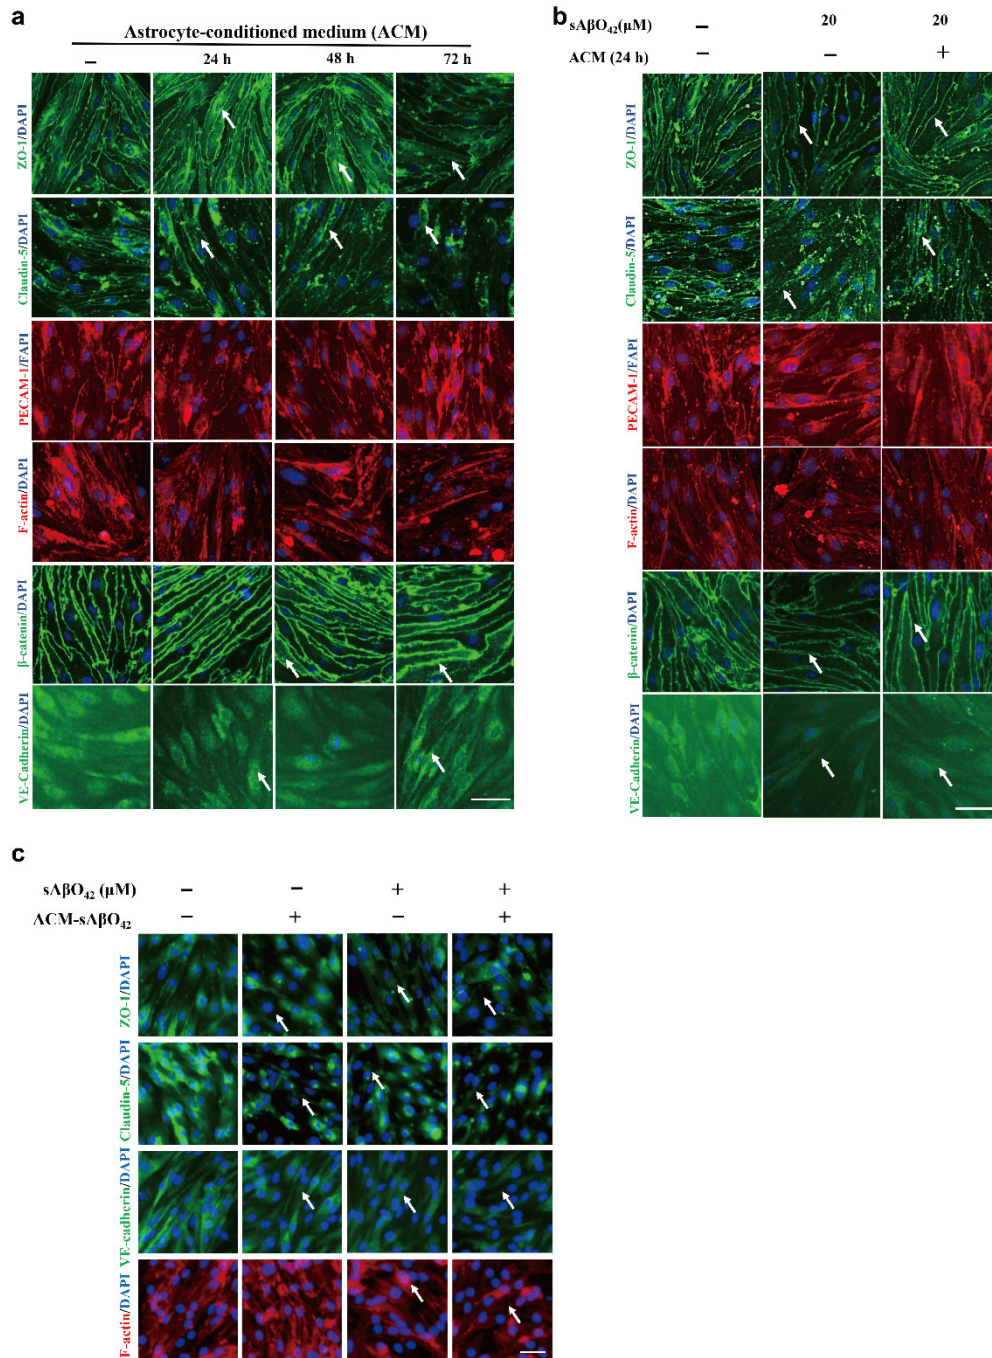

**Figure S2.** (a) Effects of ACM collected at different time points on the expression level and localization of tight junction proteins (ZO-1, Claudin-5), adherens junction proteins (VE-Cadherin, PECAM-1, β-catenin) and cytoskeleton (F-actin). (b) Protective effects of ACM (24h) on sAβO<sub>42</sub>-induced downregulation of junctional proteins in bEnd.3 cells. Immunofluorescent staining of tight junction proteins (ZO-1, Claudin-5), adherens junction proteins (VE-cadherin, PECAM-1, β-catenin) and cytoskeleton (F-actin). (c) ACM-Aβ(10μM) resulted in downregulation of ZO-1, Claudin-5, VE-cadherin and F-actin with or without sAβO<sub>42</sub>(10μM) cotreatment. sAβO<sub>42</sub>(10μM) induced no loss of ZO-1 or less loss of Claudin-5. Immunofluorescent staining of tight junction proteins (ZO-1, Claudin-5), adherens junction proteins (VE-cadherin) and cytoskeleton (F-actin). Scale bar, 3μm. Detected by IN Cell Analyzer 2000 (40×, 21°C) and Analyzed by Image J software.
